# Supplementary material
Source: Springer Nature journal article supplement (https://www.springermedizin.de/resource/supplementary/12935_2011_344_MOESM2_ESM.pdf/9540350)

Cell Counts

56

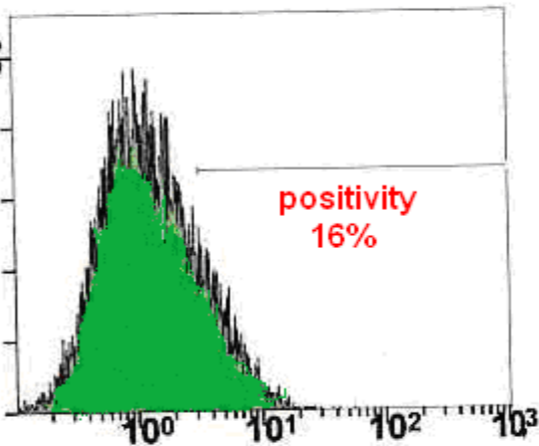

CD24 (FITC)

Supplement: MOESM2 [file 9540350]
